# Supplementary material for: Resistance Training and Handball Players’ Isokinetic, Isometric and Maximal Strength, Muscle Power and Throwing Ball Velocity: A Systematic Review and Meta-Analysis
Source: PubMed Central journal article supplement (PMC7215414; doi:10.3390/ijerph17082663), 2020-04-13
Supplement: ijerph-17-02663-s001.pdf [file ijerph-17-02663-s001.pdf]

| <i>Gorostiaga et al 2005</i>                                                                                                                                                                                                  | Score |
|-------------------------------------------------------------------------------------------------------------------------------------------------------------------------------------------------------------------------------|-------|
| <i>Reporting</i>                                                                                                                                                                                                              |       |
| 1. Is the hypothesis/aim/objective of the study clearly described?                                                                                                                                                            | 1     |
| 2. Are the main outcomes to be measured clearly described in the introduction or methods section?                                                                                                                             | 1     |
| 3. Are the characteristics of the patients included in the study clearly described?                                                                                                                                           | 1     |
| 4. Are the intervention of interest clearly described?                                                                                                                                                                        | 1     |
| 5. Are the distributions of principal confounder in each group of subjects to be compared clearly described?                                                                                                                  | 1     |
| 6. Are the main findings of the study clearly described?                                                                                                                                                                      | 1     |
| 7. Does the study provide estimates of the random variability in the data for the main outcomes?                                                                                                                              | 1     |
| 8. Have all of the important adverse events that may be a consequence of the intervention been reported?                                                                                                                      | 0     |
| 9. Have the characteristics of patients lost to follow-up been described?                                                                                                                                                     | 0     |
| 10. Have actual probability values been reported for the main outcomes except where the probability value is less than 0.001?                                                                                                 | 0     |
| <i>External validity</i>                                                                                                                                                                                                      |       |
| 11. Were the subjects asked to participate in the study representative of the entire sample from which they were recruited?                                                                                                   | 1     |
| 12. Were those subjects who were prepared to participated representative of the entire population from which they were recruited?                                                                                             | 0     |
| 13. Were the staff, places, and facilities where the patients were treated, representative of the treatment the majority of patients receive?                                                                                 | 1     |
| <i>Study bias</i>                                                                                                                                                                                                             |       |
| 14. Was an attempt made to blind study subjects to the intervention they received?                                                                                                                                            | 0     |
| 15. Was an attempt made to blind those measuring the main outcomes of the intervention?                                                                                                                                       | 0     |
| 16. If any of the results of the study were based on “data dredging”, was this made clear?                                                                                                                                    | 0     |
| 17. In trials and cohort studies, do the analyses adjust for different lengths of follow-up of patients, or in case-control studies, is the time period between the intervention and outcome the same for cases and controls? | 1     |
| 18. Were the statistical tests used to assess the main outcomes appropriate?                                                                                                                                                  | 1     |
| 19. Was compliance with the intervention/s reliable?                                                                                                                                                                          | 0     |
| 20. Were the main outcome measures used accurate (valid and reliable)?                                                                                                                                                        | 0     |
| <i>Confounding (selection bias)</i>                                                                                                                                                                                           |       |
| 21. Were the patients in different intervention groups (trials and cohort studies) or were the cases and controls (case-control studies) recruited from the same population?                                                  | 1     |
| 22. Were study subjects in different intervention groups (trials and                                                                                                                                                          | 1     |

|                                                                                                                                                          |              |
|----------------------------------------------------------------------------------------------------------------------------------------------------------|--------------|
| cohort studies) or were the cases and controls (case-control studies) recruited over the same time?                                                      |              |
| 23. Were study subjects randomized to intervention groups?                                                                                               | 1            |
| 24. Was the randomized intervention assignment concealed from both patients and health care staff until recruitment was complete and irrevocable?        | 0            |
| 25. Was there adequate adjustment for confounding in the analyses from which the main findings were drawn?                                               | 0            |
| 26. Were losses of patients to follow-up taken into account?                                                                                             | 0            |
| <i>Power</i>                                                                                                                                             |              |
| 27. Did the study have sufficient power to detect a clinically important effect where the probability value for a difference being due to chance is < 5% | 1            |
| <b><i>Holm et al 2004</i></b>                                                                                                                            | <b>Score</b> |
| <i>Reporting</i>                                                                                                                                         |              |
| 1. Is the hypothesis/aim/objective of the study clearly described?                                                                                       | 1            |
| 2. Are the main outcomes to be measured clearly described in the introduction or methods section?                                                        | 1            |
| 3. Are the characteristics of the patients included in the study clearly described?                                                                      | 1            |
| 4. Are the intervention of interest clearly described?                                                                                                   | 1            |
| 5. Are the distributions of principal confounder in each group of subjects to be compared clearly described?                                             | 1            |
| 6. Are the main findings of the study clearly described?                                                                                                 | 1            |
| 7. Does the study provide estimates of the random variability in the data for the main outcomes?                                                         | 1            |
| 8. Have all of the important adverse events that may be a consequence of the intervention been reported?                                                 | 0            |
| 9. Have the characteristics of patients lost to follow-up been described?                                                                                | 0            |
| 10. Have actual probability values been reported for the main outcomes except where the probability value is less than 0.001?                            | 0            |
| <i>External validity</i>                                                                                                                                 |              |
| 11. Were the subjects asked to participate in the study representative of the entire sample from which they were recruited?                              | 1            |
| 12. Were those subjects who were prepared to participated representative of the entire population from which they were recruited?                        | 0            |
| 13. Were the staff, places, and facilities where the patients were treated, representative of the treatment the majority of patients receive?            | 1            |
| <i>Study bias</i>                                                                                                                                        |              |
| 14. Was an attempt made to blind study subjects to the intervention they received?                                                                       | 0            |
| 15. Was an attempt made to blind those measuring the main outcomes of the intervention?                                                                  | 0            |
| 16. If any of the results of the study were based on “data dredging”, was this made clear?                                                               | 0            |
| 17. In trials and cohort studies, do the analyses adjust for different lengths of follow-up of patients, or in case-control studies, is the              | 1            |

|                                                                                                                                                                              |              |
|------------------------------------------------------------------------------------------------------------------------------------------------------------------------------|--------------|
| time period between the intervention and outcome the same for cases and controls?                                                                                            |              |
| 18. Were the statistical tests used to assess the main outcomes appropriate?                                                                                                 | 1            |
| 19. Was compliance with the intervention/s reliable?                                                                                                                         | 0            |
| 20. Were the main outcome measures used accurate (valid and reliable)?                                                                                                       | 0            |
| <i>Confounding (selection bias)</i>                                                                                                                                          |              |
| 21. Were the patients in different intervention groups (trials and cohort studies) or were the cases and controls (case-control studies) recruited from the same population? | 1            |
| 22. Were study subjects in different intervention groups (trials and cohort studies) or were the cases and controls (case-control studies) recruited over the same time?     | 1            |
| 23. Were study subjects randomized to intervention groups?                                                                                                                   | 1            |
| 24. Was the randomized intervention assignment concealed from both patients and health care staff until recruitment was complete and irrevocable?                            | 0            |
| 25. Was there adequate adjustment for confounding in the analyses from which the main findings were drawn?                                                                   | 0            |
| 26. Were losses of patients to follow-up taken into account?                                                                                                                 | 0            |
| <i>Power</i>                                                                                                                                                                 |              |
| 27. Did the study have sufficient power to detect a clinically important effect where the probability value for a difference being due to chance is < 5%                     | 1            |
| <b><i>Oxyzoglou et al 2007</i></b>                                                                                                                                           | <b>Score</b> |
| <i>Reporting</i>                                                                                                                                                             |              |
| 1. Is the hypothesis/aim/objective of the study clearly described?                                                                                                           | 1            |
| 2. Are the main outcomes to be measured clearly described in the introduction or methods section?                                                                            | 1            |
| 3. Are the characteristics of the patients included in the study clearly described?                                                                                          | 1            |
| 4. Are the intervention of interest clearly described?                                                                                                                       | 1            |
| 5. Are the distributions of principal confounder in each group of subjects to be compared clearly described?                                                                 | 1            |
| 6. Are the main findings of the study clearly described?                                                                                                                     | 1            |
| 7. Does the study provide estimates of the random variability in the data for the main outcomes?                                                                             | 1            |
| 8. Have all of the important adverse events that may be a consequence of the intervention been reported?                                                                     | 0            |
| 9. Have the characteristics of patients lost to follow-up been described?                                                                                                    | 1            |
| 10. Have actual probability values been reported for the main outcomes except where the probability value is less than 0.001?                                                | 0            |
| <i>External validity</i>                                                                                                                                                     |              |
| 11. Were the subjects asked to participate in the study representative of the entire sample from which they were recruited?                                                  | 1            |
| 12. Were those subjects who were prepared to participated representative of the entire population from which they were recruited?                                            | 0            |

|                                                                                                                                                                                                                               |              |
|-------------------------------------------------------------------------------------------------------------------------------------------------------------------------------------------------------------------------------|--------------|
| 13. Were the staff, places, and facilities where the patients were treated, representative of the treatment the majority of patients receive?                                                                                 | 1            |
| <i>Study bias</i>                                                                                                                                                                                                             |              |
| 14. Was an attempt made to blind study subjects to the intervention they received?                                                                                                                                            | 0            |
| 15. Was an attempt made to blind those measuring the main outcomes of the intervention?                                                                                                                                       | 0            |
| 16. If any of the results of the study were based on “data dredging”, was this made clear?                                                                                                                                    | 0            |
| 17. In trials and cohort studies, do the analyses adjust for different lengths of follow-up of patients, or in case-control studies, is the time period between the intervention and outcome the same for cases and controls? | 1            |
| 18. Were the statistical tests used to assess the main outcomes appropriate?                                                                                                                                                  | 1            |
| 19. Was compliance with the intervention/s reliable?                                                                                                                                                                          | 0            |
| 20. Were the main outcome measures used accurate (valid and reliable)?                                                                                                                                                        | 0            |
| <i>Confounding (selection bias)</i>                                                                                                                                                                                           |              |
| 21. Were the patients in different intervention groups (trials and cohort studies) or were the cases and controls (case-control studies) recruited from the same population?                                                  | 1            |
| 22. Were study subjects in different intervention groups (trials and cohort studies) or were the cases and controls (case-control studies) recruited over the same time?                                                      | 1            |
| 23. Were study subjects randomized to intervention groups?                                                                                                                                                                    | 1            |
| 24. Was the randomized intervention assignment concealed from both patients and health care staff until recruitment was complete and irrevocable?                                                                             | 0            |
| 25. Was there adequate adjustment for confounding in the analyses from which the main findings were drawn?                                                                                                                    | 0            |
| 26. Were losses of patients to follow-up taken into account?                                                                                                                                                                  | 0            |
| <i>Power</i>                                                                                                                                                                                                                  |              |
| 27. Did the study have sufficient power to detect a clinically important effect where the probability value for a difference being due to chance is < 5%                                                                      | 1            |
| <b><i>Ettema et al 2008</i></b>                                                                                                                                                                                               | <b>Score</b> |
| <i>Reporting</i>                                                                                                                                                                                                              |              |
| 1. Is the hypothesis/aim/objective of the study clearly described?                                                                                                                                                            | 1            |
| 2. Are the main outcomes to be measured clearly described in the introduction or methods section?                                                                                                                             | 1            |
| 3. Are the characteristics of the patients included in the study clearly described?                                                                                                                                           | 1            |
| 4. Are the intervention of interest clearly described?                                                                                                                                                                        | 1            |
| 5. Are the distributions of principal confounder in each group of subjects to be compared clearly described?                                                                                                                  | 1            |
| 6. Are the main findings of the study clearly described?                                                                                                                                                                      | 1            |
| 7. Does the study provide estimates of the random variability in the data for the main outcomes?                                                                                                                              | 1            |

|                                                                                                                                                                                                                               |              |
|-------------------------------------------------------------------------------------------------------------------------------------------------------------------------------------------------------------------------------|--------------|
| 8. Have all of the important adverse events that may be a consequence of the intervention been reported?                                                                                                                      | 0            |
| 9. Have the characteristics of patients lost to follow-up been described?                                                                                                                                                     | 1            |
| 10. Have actual probability values been reported for the main outcomes except where the probability value is less than 0.001?                                                                                                 | 0            |
| <i>External validity</i>                                                                                                                                                                                                      |              |
| 11. Were the subjects asked to participate in the study representative of the entire sample from which they were recruited?                                                                                                   | 0            |
| 12. Were those subjects who were prepared to participated representative of the entire population from which they were recruited?                                                                                             | 0            |
| 13. Were the staff, places, and facilities where the patients were treated, representative of the treatment the majority of patients receive?                                                                                 | 1            |
| <i>Study bias</i>                                                                                                                                                                                                             |              |
| 14. Was an attempt made to blind study subjects to the intervention they received?                                                                                                                                            | 0            |
| 15. Was an attempt made to blind those measuring the main outcomes of the intervention?                                                                                                                                       | 0            |
| 16. If any of the results of the study were based on “data dredging”, was this made clear?                                                                                                                                    | 0            |
| 17. In trials and cohort studies, do the analyses adjust for different lengths of follow-up of patients, or in case-control studies, is the time period between the intervention and outcome the same for cases and controls? | 1            |
| 18. Were the statistical tests used to assess the main outcomes appropriate?                                                                                                                                                  | 1            |
| 19. Was compliance with the intervention/s reliable?                                                                                                                                                                          | 0            |
| 20. Were the main outcome measures used accurate (valid and reliable)?                                                                                                                                                        | 0            |
| <i>Confounding (selection bias)</i>                                                                                                                                                                                           |              |
| 21. Were the patients in different intervention groups (trials and cohort studies) or were the cases and controls (case-control studies) recruited from the same population?                                                  | 1            |
| 22. Were study subjects in different intervention groups (trials and cohort studies) or were the cases and controls (case-control studies) recruited over the same time?                                                      | 1            |
| 23. Were study subjects randomized to intervention groups?                                                                                                                                                                    | 1            |
| 24. Was the randomized intervention assignment concealed from both patients and health care staff until recruitment was complete and irrevocable?                                                                             | 0            |
| 25. Was there adequate adjustment for confounding in the analyses from which the main findings were drawn?                                                                                                                    | 0            |
| 26. Were losses of patients to follow-up taken into account?                                                                                                                                                                  | 0            |
| <i>Power</i>                                                                                                                                                                                                                  |              |
| 27. Did the study have sufficient power to detect a clinically important effect where the probability value for a difference being due to chance is < 5%                                                                      | 1            |
| <b><i>Gorostiaga et al 1999</i></b>                                                                                                                                                                                           | <b>Score</b> |

|                                                                                                                                                                                                                               |   |
|-------------------------------------------------------------------------------------------------------------------------------------------------------------------------------------------------------------------------------|---|
| <i>Reporting</i>                                                                                                                                                                                                              |   |
| 1. Is the hypothesis/aim/objective of the study clearly described?                                                                                                                                                            | 1 |
| 2. Are the main outcomes to be measured clearly described in the introduction or methods section?                                                                                                                             | 1 |
| 3. Are the characteristics of the patients included in the study clearly described?                                                                                                                                           | 1 |
| 4. Are the intervention of interest clearly described?                                                                                                                                                                        | 1 |
| 5. Are the distributions of principal confounder in each group of subjects to be compared clearly described?                                                                                                                  | 1 |
| 6. Are the main findings of the study clearly described?                                                                                                                                                                      | 1 |
| 7. Does the study provide estimates of the random variability in the data for the main outcomes?                                                                                                                              | 1 |
| 8. Have all of the important adverse events that may be a consequence of the intervention been reported?                                                                                                                      | 0 |
| 9. Have the characteristics of patients lost to follow-up been described?                                                                                                                                                     | 1 |
| 10. Have actual probability values been reported for the main outcomes except where the probability value is less than 0.001?                                                                                                 | 1 |
| <i>External validity</i>                                                                                                                                                                                                      |   |
| 11. Were the subjects asked to participate in the study representative of the entire sample from which they were recruited?                                                                                                   | 1 |
| 12. Were those subjects who were prepared to participated representative of the entire population from which they were recruited?                                                                                             | 0 |
| 13. Were the staff, places, and facilities where the patients were treated, representative of the treatment the majority of patients receive?                                                                                 | 1 |
| <i>Study bias</i>                                                                                                                                                                                                             |   |
| 14. Was an attempt made to blind study subjects to the intervention they received?                                                                                                                                            | 0 |
| 15. Was an attempt made to blind those measuring the main outcomes of the intervention?                                                                                                                                       | 0 |
| 16. If any of the results of the study were based on “data dredging”, was this made clear?                                                                                                                                    | 0 |
| 17. In trials and cohort studies, do the analyses adjust for different lengths of follow-up of patients, or in case-control studies, is the time period between the intervention and outcome the same for cases and controls? | 1 |
| 18. Were the statistical tests used to assess the main outcomes appropriate?                                                                                                                                                  | 1 |
| 19. Was compliance with the intervention/s reliable?                                                                                                                                                                          | 0 |
| 20. Were the main outcome measures used accurate (valid and reliable)?                                                                                                                                                        | 0 |
| <i>Confounding (selection bias)</i>                                                                                                                                                                                           |   |
| 21. Were the patients in different intervention groups (trials and cohort studies) or were the cases and controls (case-control studies) recruited from the same population?                                                  | 1 |
| 22. Were study subjects in different intervention groups (trials and cohort studies) or were the cases and controls (case-control studies) recruited over the same time?                                                      | 1 |

|                                                                                                                                                                                                                               |              |
|-------------------------------------------------------------------------------------------------------------------------------------------------------------------------------------------------------------------------------|--------------|
| 23. Were study subjects randomized to intervention groups?                                                                                                                                                                    | 0            |
| 24. Was the randomized intervention assignment concealed from both patients and health care staff until recruitment was complete and irrevocable?                                                                             | 0            |
| 25. Was there adequate adjustment for confounding in the analyses from which the main findings were drawn?                                                                                                                    | 0            |
| 26. Were losses of patients to follow-up taken into account?                                                                                                                                                                  | 0            |
| <i>Power</i>                                                                                                                                                                                                                  |              |
| 27. Did the study have sufficient power to detect a clinically important effect where the probability value for a difference being due to chance is < 5%                                                                      | 1            |
| <b><i>Hermassi et al 2010</i></b>                                                                                                                                                                                             | <b>Score</b> |
| <i>Reporting</i>                                                                                                                                                                                                              |              |
| 1. Is the hypothesis/aim/objective of the study clearly described?                                                                                                                                                            | 1            |
| 2. Are the main outcomes to be measured clearly described in the introduction or methods section?                                                                                                                             | 1            |
| 3. Are the characteristics of the patients included in the study clearly described?                                                                                                                                           | 1            |
| 4. Are the intervention of interest clearly described?                                                                                                                                                                        | 1            |
| 5. Are the distributions of principal confounder in each group of subjects to be compared clearly described?                                                                                                                  | 1            |
| 6. Are the main findings of the study clearly described?                                                                                                                                                                      | 1            |
| 7. Does the study provide estimates of the random variability in the data for the main outcomes?                                                                                                                              | 1            |
| 8. Have all of the important adverse events that may be a consequence of the intervention been reported?                                                                                                                      | 0            |
| 9. Have the characteristics of patients lost to follow-up been described?                                                                                                                                                     | 0            |
| 10. Have actual probability values been reported for the main outcomes except where the probability value is less than 0.001?                                                                                                 | 1            |
| <i>External validity</i>                                                                                                                                                                                                      |              |
| 11. Were the subjects asked to participate in the study representative of the entire sample from which they were recruited?                                                                                                   | 1            |
| 12. Were those subjects who were prepared to participated representative of the entire population from which they were recruited?                                                                                             | 0            |
| 13. Were the staff, places, and facilities where the patients were treated, representative of the treatment the majority of patients receive?                                                                                 | 1            |
| <i>Study bias</i>                                                                                                                                                                                                             |              |
| 14. Was an attempt made to blind study subjects to the intervention they received?                                                                                                                                            | 0            |
| 15. Was an attempt made to blind those measuring the main outcomes of the intervention?                                                                                                                                       | 0            |
| 16. If any of the results of the study were based on “data dredging”, was this made clear?                                                                                                                                    | 0            |
| 17. In trials and cohort studies, do the analyses adjust for different lengths of follow-up of patients, or in case-control studies, is the time period between the intervention and outcome the same for cases and controls? | 1            |

|                                                                                                                                                                              |              |
|------------------------------------------------------------------------------------------------------------------------------------------------------------------------------|--------------|
| 18. Were the statistical tests used to assess the main outcomes appropriate?                                                                                                 | 1            |
| 19. Was compliance with the intervention/s reliable?                                                                                                                         | 0            |
| 20. Were the main outcome measures used accurate (valid and reliable)?                                                                                                       | 1            |
| <i>Confounding (selection bias)</i>                                                                                                                                          |              |
| 21. Were the patients in different intervention groups (trials and cohort studies) or were the cases and controls (case-control studies) recruited from the same population? | 1            |
| 22. Were study subjects in different intervention groups (trials and cohort studies) or were the cases and controls (case-control studies) recruited over the same time?     | 1            |
| 23. Were study subjects randomized to intervention groups?                                                                                                                   | 1            |
| 24. Was the randomized intervention assignment concealed from both patients and health care staff until recruitment was complete and irrevocable?                            | 0            |
| 25. Was there adequate adjustment for confounding in the analyses from which the main findings were drawn?                                                                   | 0            |
| 26. Were losses of patients to follow-up taken into account?                                                                                                                 | 0            |
| <i>Power</i>                                                                                                                                                                 |              |
| 27. Did the study have sufficient power to detect a clinically important effect where the probability value for a difference being due to chance is < 5%                     | 1            |
| <b><i>Hermassi et al 2011</i></b>                                                                                                                                            | <b>Score</b> |
| <i>Reporting</i>                                                                                                                                                             |              |
| 1. Is the hypothesis/aim/objective of the study clearly described?                                                                                                           | 1            |
| 2. Are the main outcomes to be measured clearly described in the introduction or methods section?                                                                            | 1            |
| 3. Are the characteristics of the patients included in the study clearly described?                                                                                          | 1            |
| 4. Are the intervention of interest clearly described?                                                                                                                       | 1            |
| 5. Are the distributions of principal confounder in each group of subjects to be compared clearly described?                                                                 | 1            |
| 6. Are the main findings of the study clearly described?                                                                                                                     | 1            |
| 7. Does the study provide estimates of the random variability in the data for the main outcomes?                                                                             | 1            |
| 8. Have all of the important adverse events that may be a consequence of the intervention been reported?                                                                     | 0            |
| 9. Have the characteristics of patients lost to follow-up been described?                                                                                                    | 0            |
| 10. Have actual probability values been reported for the main outcomes except where the probability value is less than 0.001?                                                | 1            |
| <i>External validity</i>                                                                                                                                                     |              |
| 11. Were the subjects asked to participate in the study representative of the entire sample from which they were recruited?                                                  | 1            |
| 12. Were those subjects who were prepared to participated representative of the entire population from which they were recruited?                                            | 0            |
| 13. Were the staff, places, and facilities where the patients were treated, representative of the treatment the majority of patients                                         | 1            |



|                                                                                                                                                                                                                               |              |
|-------------------------------------------------------------------------------------------------------------------------------------------------------------------------------------------------------------------------------|--------------|
| receive?                                                                                                                                                                                                                      |              |
| <i>Study bias</i>                                                                                                                                                                                                             |              |
| 14. Was an attempt made to blind study subjects to the intervention they received?                                                                                                                                            | 0            |
| 15. Was an attempt made to blind those measuring the main outcomes of the intervention?                                                                                                                                       | 0            |
| 16. If any of the results of the study were based on “data dredging”, was this made clear?                                                                                                                                    | 0            |
| 17. In trials and cohort studies, do the analyses adjust for different lengths of follow-up of patients, or in case-control studies, is the time period between the intervention and outcome the same for cases and controls? | 1            |
| 18. Were the statistical tests used to assess the main outcomes appropriate?                                                                                                                                                  | 1            |
| 19. Was compliance with the intervention/s reliable?                                                                                                                                                                          | 0            |
| 20. Were the main outcome measures used accurate (valid and reliable)?                                                                                                                                                        | 1            |
| <i>Confounding (selection bias)</i>                                                                                                                                                                                           |              |
| 21. Were the patients in different intervention groups (trials and cohort studies) or were the cases and controls (case-control studies) recruited from the same population?                                                  | 1            |
| 22. Were study subjects in different intervention groups (trials and cohort studies) or were the cases and controls (case-control studies) recruited over the same time?                                                      | 1            |
| 23. Were study subjects randomized to intervention groups?                                                                                                                                                                    | 1            |
| 24. Was the randomized intervention assignment concealed from both patients and health care staff until recruitment was complete and irrevocable?                                                                             | 0            |
| 25. Was there adequate adjustment for confounding in the analyses from which the main findings were drawn?                                                                                                                    | 0            |
| 26. Were losses of patients to follow-up taken into account?                                                                                                                                                                  | 0            |
| <i>Power</i>                                                                                                                                                                                                                  |              |
| 27. Did the study have sufficient power to detect a clinically important effect where the probability value for a difference being due to chance is < 5%                                                                      | 1            |
| <b><i>Hermassi et al 2014</i></b>                                                                                                                                                                                             | <b>Score</b> |
| <i>Reporting</i>                                                                                                                                                                                                              |              |
| 1. Is the hypothesis/aim/objective of the study clearly described?                                                                                                                                                            | 1            |
| 2. Are the main outcomes to be measured clearly described in the introduction or methods section?                                                                                                                             | 1            |
| 3. Are the characteristics of the patients included in the study clearly described?                                                                                                                                           | 1            |
| 4. Are the intervention of interest clearly described?                                                                                                                                                                        | 1            |
| 5. Are the distributions of principal confounder in each group of subjects to be compared clearly described?                                                                                                                  | 1            |
| 6. Are the main findings of the study clearly described?                                                                                                                                                                      | 1            |
| 7. Does the study provide estimates of the random variability in the data for the main outcomes?                                                                                                                              | 1            |
| 8. Have all of the important adverse events that may be a consequence of the intervention been reported?                                                                                                                      | 0            |

|                                                                                                                                                                                                                               |   |
|-------------------------------------------------------------------------------------------------------------------------------------------------------------------------------------------------------------------------------|---|
| 9. Have the characteristics of patients lost to follow-up been described?                                                                                                                                                     | 0 |
| 10. Have actual probability values been reported for the main outcomes except where the probability value is less than 0.001?                                                                                                 | 0 |
| <i>External validity</i>                                                                                                                                                                                                      |   |
| 11. Were the subjects asked to participate in the study representative of the entire sample from which they were recruited?                                                                                                   | 1 |
| 12. Were those subjects who were prepared to participated representative of the entire population from which they were recruited?                                                                                             | 0 |
| 13. Were the staff, places, and facilities where the patients were treated, representative of the treatment the majority of patients receive?                                                                                 | 1 |
| <i>Study bias</i>                                                                                                                                                                                                             |   |
| 14. Was an attempt made to blind study subjects to the intervention they received?                                                                                                                                            | 0 |
| 15. Was an attempt made to blind those measuring the main outcomes of the intervention?                                                                                                                                       | 0 |
| 16. If any of the results of the study were based on “data dredging”, was this made clear?                                                                                                                                    | 0 |
| 17. In trials and cohort studies, do the analyses adjust for different lengths of follow-up of patients, or in case-control studies, is the time period between the intervention and outcome the same for cases and controls? | 1 |
| 18. Were the statistical tests used to assess the main outcomes appropriate?                                                                                                                                                  | 1 |
| 19. Was compliance with the intervention/s reliable?                                                                                                                                                                          | 0 |
| 20. Were the main outcome measures used accurate (valid and reliable)?                                                                                                                                                        | 0 |
| <i>Confounding (selection bias)</i>                                                                                                                                                                                           |   |
| 21. Were the patients in different intervention groups (trials and cohort studies) or were the cases and controls (case-control studies) recruited from the same population?                                                  | 1 |
| 22. Were study subjects in different intervention groups (trials and cohort studies) or were the cases and controls (case-control studies) recruited over the same time?                                                      | 1 |
| 23. Were study subjects randomized to intervention groups?                                                                                                                                                                    | 1 |
| 24. Was the randomized intervention assignment concealed from both patients and health care staff until recruitment was complete and irrevocable?                                                                             | 0 |
| 25. Was there adequate adjustment for confounding in the analyses from which the main findings were drawn?                                                                                                                    | 0 |
| 26. Were losses of patients to follow-up taken into account?                                                                                                                                                                  | 0 |
| <i>Power</i>                                                                                                                                                                                                                  |   |
| 27. Did the study have sufficient power to detect a clinically important effect where the probability value for a difference being due to chance is < 5%                                                                      | 1 |
| <b><i>Hermassi et al 2015</i></b>                                                                                                                                                                                             |   |
| Score                                                                                                                                                                                                                         |   |
| <i>Reporting</i>                                                                                                                                                                                                              |   |
| 1. Is the hypothesis/aim/objective of the study clearly described?                                                                                                                                                            | 1 |

|                                                                                                                                                                                                                               |   |
|-------------------------------------------------------------------------------------------------------------------------------------------------------------------------------------------------------------------------------|---|
| 2. Are the main outcomes to be measured clearly described in the introduction or methods section?                                                                                                                             | 1 |
| 3. Are the characteristics of the patients included in the study clearly described?                                                                                                                                           | 1 |
| 4. Are the intervention of interest clearly described?                                                                                                                                                                        | 1 |
| 5. Are the distributions of principal confounder in each group of subjects to be compared clearly described?                                                                                                                  | 1 |
| 6. Are the main findings of the study clearly described?                                                                                                                                                                      | 1 |
| 7. Does the study provide estimates of the random variability in the data for the main outcomes?                                                                                                                              | 1 |
| 8. Have all of the important adverse events that may be a consequence of the intervention been reported?                                                                                                                      | 0 |
| 9. Have the characteristics of patients lost to follow-up been described?                                                                                                                                                     | 0 |
| 10. Have actual probability values been reported for the main outcomes except where the probability value is less than 0.001?                                                                                                 | 1 |
| <i>External validity</i>                                                                                                                                                                                                      |   |
| 11. Were the subjects asked to participate in the study representative of the entire sample from which they were recruited?                                                                                                   | 1 |
| 12. Were those subjects who were prepared to participated representative of the entire population from which they were recruited?                                                                                             | 0 |
| 13. Were the staff, places, and facilities where the patients were treated, representative of the treatment the majority of patients receive?                                                                                 | 1 |
| <i>Study bias</i>                                                                                                                                                                                                             |   |
| 14. Was an attempt made to blind study subjects to the intervention they received?                                                                                                                                            | 0 |
| 15. Was an attempt made to blind those measuring the main outcomes of the intervention?                                                                                                                                       | 0 |
| 16. If any of the results of the study were based on “data dredging”, was this made clear?                                                                                                                                    | 0 |
| 17. In trials and cohort studies, do the analyses adjust for different lengths of follow-up of patients, or in case-control studies, is the time period between the intervention and outcome the same for cases and controls? | 1 |
| 18. Were the statistical tests used to assess the main outcomes appropriate?                                                                                                                                                  | 1 |
| 19. Was compliance with the intervention/s reliable?                                                                                                                                                                          | 0 |
| 20. Were the main outcome measures used accurate (valid and reliable)?                                                                                                                                                        | 1 |
| <i>Confounding (selection bias)</i>                                                                                                                                                                                           |   |
| 21. Were the patients in different intervention groups (trials and cohort studies) or were the cases and controls (case-control studies) recruited from the same population?                                                  | 1 |
| 22. Were study subjects in different intervention groups (trials and cohort studies) or were the cases and controls (case-control studies) recruited over the same time?                                                      | 1 |
| 23. Were study subjects randomized to intervention groups?                                                                                                                                                                    | 1 |
| 24. Was the randomized intervention assignment concealed from both                                                                                                                                                            | 0 |

|                                                                                                                                                                                                                               |              |
|-------------------------------------------------------------------------------------------------------------------------------------------------------------------------------------------------------------------------------|--------------|
| patients and health care staff until recruitment was complete and irrevocable?                                                                                                                                                |              |
| 25. Was there adequate adjustment for confounding in the analyses from which the main findings were drawn?                                                                                                                    | 0            |
| 26. Were losses of patients to follow-up taken into account?                                                                                                                                                                  | 0            |
| <i>Power</i>                                                                                                                                                                                                                  |              |
| 27. Did the study have sufficient power to detect a clinically important effect where the probability value for a difference being due to chance is < 5%                                                                      | 1            |
| <b>Marques &amp; González-Badillo 2006</b>                                                                                                                                                                                    | <b>Score</b> |
| <i>Reporting</i>                                                                                                                                                                                                              |              |
| 1. Is the hypothesis/aim/objective of the study clearly described?                                                                                                                                                            | 1            |
| 2. Are the main outcomes to be measured clearly described in the introduction or methods section?                                                                                                                             | 1            |
| 3. Are the characteristics of the patients included in the study clearly described?                                                                                                                                           | 1            |
| 4. Are the intervention of interest clearly described?                                                                                                                                                                        | 1            |
| 5. Are the distributions of principal confounder in each group of subjects to be compared clearly described?                                                                                                                  | 1            |
| 6. Are the main findings of the study clearly described?                                                                                                                                                                      | 1            |
| 7. Does the study provide estimates of the random variability in the data for the main outcomes?                                                                                                                              | 1            |
| 8. Have all of the important adverse events that may be a consequence of the intervention been reported?                                                                                                                      | 0            |
| 9. Have the characteristics of patients lost to follow-up been described?                                                                                                                                                     | 1            |
| 10. Have actual probability values been reported for the main outcomes except where the probability value is less than 0.001?                                                                                                 | 0            |
| <i>External validity</i>                                                                                                                                                                                                      |              |
| 11. Were the subjects asked to participate in the study representative of the entire sample from which they were recruited?                                                                                                   | 1            |
| 12. Were those subjects who were prepared to participated representative of the entire population from which they were recruited?                                                                                             | 0            |
| 13. Were the staff, places, and facilities where the patients were treated, representative of the treatment the majority of patients receive?                                                                                 | 1            |
| <i>Study bias</i>                                                                                                                                                                                                             |              |
| 14. Was an attempt made to blind study subjects to the intervention they received?                                                                                                                                            | 0            |
| 15. Was an attempt made to blind those measuring the main outcomes of the intervention?                                                                                                                                       | 0            |
| 16. If any of the results of the study were based on “data dredging”, was this made clear?                                                                                                                                    | 0            |
| 17. In trials and cohort studies, do the analyses adjust for different lengths of follow-up of patients, or in case-control studies, is the time period between the intervention and outcome the same for cases and controls? | 1            |
| 18. Were the statistical tests used to assess the main outcomes appropriate?                                                                                                                                                  | 1            |

|                                                                                                                                                                              |              |
|------------------------------------------------------------------------------------------------------------------------------------------------------------------------------|--------------|
| 19. Was compliance with the intervention/s reliable?                                                                                                                         | 0            |
| 20. Were the main outcome measures used accurate (valid and reliable)?                                                                                                       | 0            |
| <i>Confounding (selection bias)</i>                                                                                                                                          |              |
| 21. Were the patients in different intervention groups (trials and cohort studies) or were the cases and controls (case-control studies) recruited from the same population? | 1            |
| 22. Were study subjects in different intervention groups (trials and cohort studies) or were the cases and controls (case-control studies) recruited over the same time?     | 1            |
| 23. Were study subjects randomized to intervention groups?                                                                                                                   | 1            |
| 24. Was the randomized intervention assignment concealed from both patients and health care staff until recruitment was complete and irrevocable?                            | 0            |
| 25. Was there adequate adjustment for confounding in the analyses from which the main findings were drawn?                                                                   | 0            |
| 26. Were losses of patients to follow-up taken into account?                                                                                                                 | 0            |
| <i>Power</i>                                                                                                                                                                 |              |
| 27. Did the study have sufficient power to detect a clinically important effect where the probability value for a difference being due to chance is < 5%                     | 1            |
| <b><i>Ignjatovic et al 2012</i></b>                                                                                                                                          | <b>Score</b> |
| <i>Reporting</i>                                                                                                                                                             |              |
| 1. Is the hypothesis/aim/objective of the study clearly described?                                                                                                           | 1            |
| 2. Are the main outcomes to be measured clearly described in the introduction or methods section?                                                                            | 1            |
| 3. Are the characteristics of the patients included in the study clearly described?                                                                                          | 1            |
| 4. Are the intervention of interest clearly described?                                                                                                                       | 1            |
| 5. Are the distributions of principal confounder in each group of subjects to be compared clearly described?                                                                 | 1            |
| 6. Are the main findings of the study clearly described?                                                                                                                     | 1            |
| 7. Does the study provide estimates of the random variability in the data for the main outcomes?                                                                             | 1            |
| 8. Have all of the important adverse events that may be a consequence of the intervention been reported?                                                                     | 0            |
| 9. Have the characteristics of patients lost to follow-up been described?                                                                                                    | 1            |
| 10. Have actual probability values been reported for the main outcomes except where the probability value is less than 0.001?                                                | 0            |
| <i>External validity</i>                                                                                                                                                     |              |
| 11. Were the subjects asked to participate in the study representative of the entire sample from which they were recruited?                                                  | 1            |
| 12. Were those subjects who were prepared to participated representative of the entire population from which they were recruited?                                            | 0            |
| 13. Were the staff, places, and facilities where the patients were treated, representative of the treatment the majority of patients receive?                                | 1            |
| <i>Study bias</i>                                                                                                                                                            |              |

|                                                                                                                                                                                                                               |              |
|-------------------------------------------------------------------------------------------------------------------------------------------------------------------------------------------------------------------------------|--------------|
| 14. Was an attempt made to blind study subjects to the intervention they received?                                                                                                                                            | 0            |
| 15. Was an attempt made to blind those measuring the main outcomes of the intervention?                                                                                                                                       | 0            |
| 16. If any of the results of the study were based on “data dredging”, was this made clear?                                                                                                                                    | 0            |
| 17. In trials and cohort studies, do the analyses adjust for different lengths of follow-up of patients, or in case-control studies, is the time period between the intervention and outcome the same for cases and controls? | 1            |
| 18. Were the statistical tests used to assess the main outcomes appropriate?                                                                                                                                                  | 1            |
| 19. Was compliance with the intervention/s reliable?                                                                                                                                                                          | 0            |
| 20. Were the main outcome measures used accurate (valid and reliable)?                                                                                                                                                        | 1            |
| <i>Confounding (selection bias)</i>                                                                                                                                                                                           |              |
| 21. Were the patients in different intervention groups (trials and cohort studies) or were the cases and controls (case-control studies) recruited from the same population?                                                  | 1            |
| 22. Were study subjects in different intervention groups (trials and cohort studies) or were the cases and controls (case-control studies) recruited over the same time?                                                      | 1            |
| 23. Were study subjects randomized to intervention groups?                                                                                                                                                                    | 1            |
| 24. Was the randomized intervention assignment concealed from both patients and health care staff until recruitment was complete and irrevocable?                                                                             | 0            |
| 25. Was there adequate adjustment for confounding in the analyses from which the main findings were drawn?                                                                                                                    | 0            |
| 26. Were losses of patients to follow-up taken into account?                                                                                                                                                                  | 0            |
| <i>Power</i>                                                                                                                                                                                                                  |              |
| 27. Did the study have sufficient power to detect a clinically important effect where the probability value for a difference being due to chance is < 5%                                                                      | 1            |
| <b><i>Carvalho et al 2014</i></b>                                                                                                                                                                                             | <b>Score</b> |
| <i>Reporting</i>                                                                                                                                                                                                              |              |
| 1. Is the hypothesis/aim/objective of the study clearly described?                                                                                                                                                            | 1            |
| 2. Are the main outcomes to be measured clearly described in the introduction or methods section?                                                                                                                             | 1            |
| 3. Are the characteristics of the patients included in the study clearly described?                                                                                                                                           | 1            |
| 4. Are the intervention of interest clearly described?                                                                                                                                                                        | 1            |
| 5. Are the distributions of principal confounder in each group of subjects to be compared clearly described?                                                                                                                  | 1            |
| 6. Are the main findings of the study clearly described?                                                                                                                                                                      | 1            |
| 7. Does the study provide estimates of the random variability in the data for the main outcomes?                                                                                                                              | 1            |
| 8. Have all of the important adverse events that may be a consequence of the intervention been reported?                                                                                                                      | 0            |
| 9. Have the characteristics of patients lost to follow-up been described?                                                                                                                                                     | 1            |

|                                                                                                                                                                                                                               |       |
|-------------------------------------------------------------------------------------------------------------------------------------------------------------------------------------------------------------------------------|-------|
| 10. Have actual probability values been reported for the main outcomes except where the probability value is less than 0.001?                                                                                                 | 0     |
| <i>External validity</i>                                                                                                                                                                                                      |       |
| 11. Were the subjects asked to participate in the study representative of the entire sample from which they were recruited?                                                                                                   | 1     |
| 12. Were those subjects who were prepared to participated representative of the entire population from which they were recruited?                                                                                             | 0     |
| 13. Were the staff, places, and facilities where the patients were treated, representative of the treatment the majority of patients receive?                                                                                 | 1     |
| <i>Study bias</i>                                                                                                                                                                                                             |       |
| 14. Was an attempt made to blind study subjects to the intervention they received?                                                                                                                                            | 0     |
| 15. Was an attempt made to blind those measuring the main outcomes of the intervention?                                                                                                                                       | 0     |
| 16. If any of the results of the study were based on “data dredging”, was this made clear?                                                                                                                                    | 0     |
| 17. In trials and cohort studies, do the analyses adjust for different lengths of follow-up of patients, or in case-control studies, is the time period between the intervention and outcome the same for cases and controls? | 1     |
| 18. Were the statistical tests used to assess the main outcomes appropriate?                                                                                                                                                  | 1     |
| 19. Was compliance with the intervention/s reliable?                                                                                                                                                                          | 0     |
| 20. Were the main outcome measures used accurate (valid and reliable)?                                                                                                                                                        | 0     |
| <i>Confounding (selection bias)</i>                                                                                                                                                                                           |       |
| 21. Were the patients in different intervention groups (trials and cohort studies) or were the cases and controls (case-control studies) recruited from the same population?                                                  | 1     |
| 22. Were study subjects in different intervention groups (trials and cohort studies) or were the cases and controls (case-control studies) recruited over the same time?                                                      | 1     |
| 23. Were study subjects randomized to intervention groups?                                                                                                                                                                    | 0     |
| 24. Was the randomized intervention assignment concealed from both patients and health care staff until recruitment was complete and irrevocable?                                                                             | 0     |
| 25. Was there adequate adjustment for confounding in the analyses from which the main findings were drawn?                                                                                                                    | 0     |
| 26. Were losses of patients to follow-up taken into account?                                                                                                                                                                  | 0     |
| <i>Power</i>                                                                                                                                                                                                                  |       |
| 27. Did the study have sufficient power to detect a clinically important effect where the probability value for a difference being due to chance is < 5%                                                                      | 1     |
| <b>Chelly et al 2014</b>                                                                                                                                                                                                      | Score |
| <i>Reporting</i>                                                                                                                                                                                                              |       |
| 1. Is the hypothesis/aim/objective of the study clearly described?                                                                                                                                                            | 1     |
| 2. Are the main outcomes to be measured clearly described in the introduction or methods section?                                                                                                                             | 1     |

|                                                                                                                                                                                                                               |   |
|-------------------------------------------------------------------------------------------------------------------------------------------------------------------------------------------------------------------------------|---|
| 3. Are the characteristics of the patients included in the study clearly described?                                                                                                                                           | 1 |
| 4. Are the intervention of interest clearly described?                                                                                                                                                                        | 1 |
| 5. Are the distributions of principal confounder in each group of subjects to be compared clearly described?                                                                                                                  | 1 |
| 6. Are the main findings of the study clearly described?                                                                                                                                                                      | 1 |
| 7. Does the study provide estimates of the random variability in the data for the main outcomes?                                                                                                                              | 1 |
| 8. Have all of the important adverse events that may be a consequence of the intervention been reported?                                                                                                                      | 0 |
| 9. Have the characteristics of patients lost to follow-up been described?                                                                                                                                                     | 1 |
| 10. Have actual probability values been reported for the main outcomes except where the probability value is less than 0.001?                                                                                                 | 0 |
| <i>External validity</i>                                                                                                                                                                                                      |   |
| 11. Were the subjects asked to participate in the study representative of the entire sample from which they were recruited?                                                                                                   | 1 |
| 12. Were those subjects who were prepared to participated representative of the entire population from which they were recruited?                                                                                             | 0 |
| 13. Were the staff, places, and facilities where the patients were treated, representative of the treatment the majority of patients receive?                                                                                 | 1 |
| <i>Study bias</i>                                                                                                                                                                                                             |   |
| 14. Was an attempt made to blind study subjects to the intervention they received?                                                                                                                                            | 0 |
| 15. Was an attempt made to blind those measuring the main outcomes of the intervention?                                                                                                                                       | 0 |
| 16. If any of the results of the study were based on “data dredging”, was this made clear?                                                                                                                                    | 0 |
| 17. In trials and cohort studies, do the analyses adjust for different lengths of follow-up of patients, or in case-control studies, is the time period between the intervention and outcome the same for cases and controls? | 1 |
| 18. Were the statistical tests used to assess the main outcomes appropriate?                                                                                                                                                  | 1 |
| 19. Was compliance with the intervention/s reliable?                                                                                                                                                                          | 0 |
| 20. Were the main outcome measures used accurate (valid and reliable)?                                                                                                                                                        | 0 |
| <i>Confounding (selection bias)</i>                                                                                                                                                                                           |   |
| 21. Were the patients in different intervention groups (trials and cohort studies) or were the cases and controls (case-control studies) recruited from the same population?                                                  | 1 |
| 22. Were study subjects in different intervention groups (trials and cohort studies) or were the cases and controls (case-control studies) recruited over the same time?                                                      | 1 |
| 23. Were study subjects randomized to intervention groups?                                                                                                                                                                    | 1 |
| 24. Was the randomized intervention assignment concealed from both patients and health care staff until recruitment was complete and irrevocable?                                                                             | 0 |



|                                                                                                                                                                                                                               |              |
|-------------------------------------------------------------------------------------------------------------------------------------------------------------------------------------------------------------------------------|--------------|
| 25. Was there adequate adjustment for confounding in the analyses from which the main findings were drawn?                                                                                                                    | 0            |
| 26. Were losses of patients to follow-up taken into account?                                                                                                                                                                  | 0            |
| <i>Power</i>                                                                                                                                                                                                                  |              |
| 27. Did the study have sufficient power to detect a clinically important effect where the probability value for a difference being due to chance is < 5%                                                                      | 1            |
| <b><i>Raeder et al 2015</i></b>                                                                                                                                                                                               | <b>Score</b> |
| <i>Reporting</i>                                                                                                                                                                                                              |              |
| 1. Is the hypothesis/aim/objective of the study clearly described?                                                                                                                                                            | 1            |
| 2. Are the main outcomes to be measured clearly described in the introduction or methods section?                                                                                                                             | 1            |
| 3. Are the characteristics of the patients included in the study clearly described?                                                                                                                                           | 1            |
| 4. Are the intervention of interest clearly described?                                                                                                                                                                        | 1            |
| 5. Are the distributions of principal confounder in each group of subjects to be compared clearly described?                                                                                                                  | 1            |
| 6. Are the main findings of the study clearly described?                                                                                                                                                                      | 1            |
| 7. Does the study provide estimates of the random variability in the data for the main outcomes?                                                                                                                              | 1            |
| 8. Have all of the important adverse events that may be a consequence of the intervention been reported?                                                                                                                      | 0            |
| 9. Have the characteristics of patients lost to follow-up been described?                                                                                                                                                     | 1            |
| 10. Have actual probability values been reported for the main outcomes except where the probability value is less than 0.001?                                                                                                 | 0            |
| <i>External validity</i>                                                                                                                                                                                                      |              |
| 11. Were the subjects asked to participate in the study representative of the entire sample from which they were recruited?                                                                                                   | 1            |
| 12. Were those subjects who were prepared to participated representative of the entire population from which they were recruited?                                                                                             | 0            |
| 13. Were the staff, places, and facilities where the patients were treated, representative of the treatment the majority of patients receive?                                                                                 | 1            |
| <i>Study bias</i>                                                                                                                                                                                                             |              |
| 14. Was an attempt made to blind study subjects to the intervention they received?                                                                                                                                            | 0            |
| 15. Was an attempt made to blind those measuring the main outcomes of the intervention?                                                                                                                                       | 0            |
| 16. If any of the results of the study were based on “data dredging”, was this made clear?                                                                                                                                    | 0            |
| 17. In trials and cohort studies, do the analyses adjust for different lengths of follow-up of patients, or in case-control studies, is the time period between the intervention and outcome the same for cases and controls? | 1            |
| 18. Were the statistical tests used to assess the main outcomes appropriate?                                                                                                                                                  | 1            |
| 19. Was compliance with the intervention/s reliable?                                                                                                                                                                          | 0            |
| 20. Were the main outcome measures used accurate (valid and                                                                                                                                                                   | 0            |

|                                                                                                                                                                              |              |
|------------------------------------------------------------------------------------------------------------------------------------------------------------------------------|--------------|
| reliable?                                                                                                                                                                    |              |
| <i>Confounding (selection bias)</i>                                                                                                                                          |              |
| 21. Were the patients in different intervention groups (trials and cohort studies) or were the cases and controls (case-control studies) recruited from the same population? | 1            |
| 22. Were study subjects in different intervention groups (trials and cohort studies) or were the cases and controls (case-control studies) recruited over the same time?     | 1            |
| 23. Were study subjects randomized to intervention groups?                                                                                                                   | 0            |
| 24. Was the randomized intervention assignment concealed from both patients and health care staff until recruitment was complete and irrevocable?                            | 0            |
| 25. Was there adequate adjustment for confounding in the analyses from which the main findings were drawn?                                                                   | 0            |
| 26. Were losses of patients to follow-up taken into account?                                                                                                                 | 0            |
| <i>Power</i>                                                                                                                                                                 |              |
| 27. Did the study have sufficient power to detect a clinically important effect where the probability value for a difference being due to chance is < 5%                     | 1            |
| <b>Genevois et al 2014</b>                                                                                                                                                   | <b>Score</b> |
| <i>Reporting</i>                                                                                                                                                             |              |
| 1. Is the hypothesis/aim/objective of the study clearly described?                                                                                                           | 1            |
| 2. Are the main outcomes to be measured clearly described in the introduction or methods section?                                                                            | 1            |
| 3. Are the characteristics of the patients included in the study clearly described?                                                                                          | 1            |
| 4. Are the intervention of interest clearly described?                                                                                                                       | 1            |
| 5. Are the distributions of principal confounder in each group of subjects to be compared clearly described?                                                                 | 1            |
| 6. Are the main findings of the study clearly described?                                                                                                                     | 1            |
| 7. Does the study provide estimates of the random variability in the data for the main outcomes?                                                                             | 1            |
| 8. Have all of the important adverse events that may be a consequence of the intervention been reported?                                                                     | 0            |
| 9. Have the characteristics of patients lost to follow-up been described?                                                                                                    | 1            |
| 10. Have actual probability values been reported for the main outcomes except where the probability value is less than 0.001?                                                | 0            |
| <i>External validity</i>                                                                                                                                                     |              |
| 11. Were the subjects asked to participate in the study representative of the entire sample from which they were recruited?                                                  | 0            |
| 12. Were those subjects who were prepared to participated representative of the entire population from which they were recruited?                                            | 0            |
| 13. Were the staff, places, and facilities where the patients were treated, representative of the treatment the majority of patients receive?                                | 1            |
| <i>Study bias</i>                                                                                                                                                            |              |
| 14. Was an attempt made to blind study subjects to the intervention they received?                                                                                           | 0            |

|                                                                                                                                                                                                                               |   |
|-------------------------------------------------------------------------------------------------------------------------------------------------------------------------------------------------------------------------------|---|
| 15. Was an attempt made to blind those measuring the main outcomes of the intervention?                                                                                                                                       | 0 |
| 16. If any of the results of the study were based on “data dredging”, was this made clear?                                                                                                                                    | 0 |
| 17. In trials and cohort studies, do the analyses adjust for different lengths of follow-up of patients, or in case-control studies, is the time period between the intervention and outcome the same for cases and controls? | 1 |
| 18. Were the statistical tests used to assess the main outcomes appropriate?                                                                                                                                                  | 1 |
| 19. Was compliance with the intervention/s reliable?                                                                                                                                                                          | 0 |
| 20. Were the main outcome measures used accurate (valid and reliable)?                                                                                                                                                        | 0 |
| <i>Confounding (selection bias)</i>                                                                                                                                                                                           |   |
| 21. Were the patients in different intervention groups (trials and cohort studies) or were the cases and controls (case-control studies) recruited from the same population?                                                  | 1 |
| 22. Were study subjects in different intervention groups (trials and cohort studies) or were the cases and controls (case-control studies) recruited over the same time?                                                      | 1 |
| 23. Were study subjects randomized to intervention groups?                                                                                                                                                                    | 1 |
| 24. Was the randomized intervention assignment concealed from both patients and health care staff until recruitment was complete and irrevocable?                                                                             | 0 |
| 25. Was there adequate adjustment for confounding in the analyses from which the main findings were drawn?                                                                                                                    | 0 |
| 26. Were losses of patients to follow-up taken into account?                                                                                                                                                                  | 0 |
| <i>Power</i>                                                                                                                                                                                                                  |   |
| 27. Did the study have sufficient power to detect a clinically important effect where the probability value for a difference being due to chance is < 5%                                                                      | 1 |
| <b><i>Granados et al 2007</i></b>                                                                                                                                                                                             |   |
| <b>Score</b>                                                                                                                                                                                                                  |   |
| <i>Reporting</i>                                                                                                                                                                                                              |   |
| 1. Is the hypothesis/aim/objective of the study clearly described?                                                                                                                                                            | 1 |
| 2. Are the main outcomes to be measured clearly described in the introduction or methods section?                                                                                                                             | 1 |
| 3. Are the characteristics of the patients included in the study clearly described?                                                                                                                                           | 1 |
| 4. Are the intervention of interest clearly described?                                                                                                                                                                        | 1 |
| 5. Are the distributions of principal confounder in each group of subjects to be compared clearly described?                                                                                                                  | 1 |
| 6. Are the main findings of the study clearly described?                                                                                                                                                                      | 1 |
| 7. Does the study provide estimates of the random variability in the data for the main outcomes?                                                                                                                              | 1 |
| 8. Have all of the important adverse events that may be a consequence of the intervention been reported?                                                                                                                      | 0 |
| 9. Have the characteristics of patients lost to follow-up been described?                                                                                                                                                     | 1 |
| 10. Have actual probability values been reported for the main outcomes except where the probability value is less than 0.001?                                                                                                 | 0 |

|                                                                                                                                                                                                                               |              |
|-------------------------------------------------------------------------------------------------------------------------------------------------------------------------------------------------------------------------------|--------------|
| <i>External validity</i>                                                                                                                                                                                                      |              |
| 11. Were the subjects asked to participate in the study representative of the entire sample from which they were recruited?                                                                                                   | 1            |
| 12. Were those subjects who were prepared to participated representative of the entire population from which they were recruited?                                                                                             | 0            |
| 13. Were the staff, places, and facilities where the patients were treated, representative of the treatment the majority of patients receive?                                                                                 | 1            |
| <i>Study bias</i>                                                                                                                                                                                                             |              |
| 14. Was an attempt made to blind study subjects to the intervention they received?                                                                                                                                            | 0            |
| 15. Was an attempt made to blind those measuring the main outcomes of the intervention?                                                                                                                                       | 0            |
| 16. If any of the results of the study were based on “data dredging”, was this made clear?                                                                                                                                    | 0            |
| 17. In trials and cohort studies, do the analyses adjust for different lengths of follow-up of patients, or in case-control studies, is the time period between the intervention and outcome the same for cases and controls? | 1            |
| 18. Were the statistical tests used to assess the main outcomes appropriate?                                                                                                                                                  | 1            |
| 19. Was compliance with the intervention/s reliable?                                                                                                                                                                          | 0            |
| 20. Were the main outcome measures used accurate (valid and reliable)?                                                                                                                                                        | 0            |
| <i>Confounding (selection bias)</i>                                                                                                                                                                                           |              |
| 21. Were the patients in different intervention groups (trials and cohort studies) or were the cases and controls (case-control studies) recruited from the same population?                                                  | 1            |
| 22. Were study subjects in different intervention groups (trials and cohort studies) or were the cases and controls (case-control studies) recruited over the same time?                                                      | 1            |
| 23. Were study subjects randomized to intervention groups?                                                                                                                                                                    | 1            |
| 24. Was the randomized intervention assignment concealed from both patients and health care staff until recruitment was complete and irrevocable?                                                                             | 0            |
| 25. Was there adequate adjustment for confounding in the analyses from which the main findings were drawn?                                                                                                                    | 0            |
| 26. Were losses of patients to follow-up taken into account?                                                                                                                                                                  | 0            |
| <i>Power</i>                                                                                                                                                                                                                  |              |
| 27. Did the study have sufficient power to detect a clinically important effect where the probability value for a difference being due to chance is < 5%                                                                      | 1            |
| <b><i>Toumi et al 2004</i></b>                                                                                                                                                                                                | <b>Score</b> |
| <i>Reporting</i>                                                                                                                                                                                                              |              |
| 1. Is the hypothesis/aim/objective of the study clearly described?                                                                                                                                                            | 1            |
| 2. Are the main outcomes to be measured clearly described in the introduction or methods section?                                                                                                                             | 1            |
| 3. Are the characteristics of the patients included in the study clearly described?                                                                                                                                           | 1            |

|                                                                                                                                                                                                                               |   |
|-------------------------------------------------------------------------------------------------------------------------------------------------------------------------------------------------------------------------------|---|
| 4. Are the intervention of interest clearly described?                                                                                                                                                                        | 1 |
| 5. Are the distributions of principal confounder in each group of subjects to be compared clearly described?                                                                                                                  | 1 |
| 6. Are the main findings of the study clearly described?                                                                                                                                                                      | 1 |
| 7. Does the study provide estimates of the random variability in the data for the main outcomes?                                                                                                                              | 1 |
| 8. Have all of the important adverse events that may be a consequence of the intervention been reported?                                                                                                                      | 0 |
| 9. Have the characteristics of patients lost to follow-up been described?                                                                                                                                                     | 1 |
| 10. Have actual probability values been reported for the main outcomes except where the probability value is less than 0.001?                                                                                                 | 0 |
| <i>External validity</i>                                                                                                                                                                                                      |   |
| 11. Were the subjects asked to participate in the study representative of the entire sample from which they were recruited?                                                                                                   | 1 |
| 12. Were those subjects who were prepared to participated representative of the entire population from which they were recruited?                                                                                             | 0 |
| 13. Were the staff, places, and facilities where the patients were treated, representative of the treatment the majority of patients receive?                                                                                 | 1 |
| <i>Study bias</i>                                                                                                                                                                                                             |   |
| 14. Was an attempt made to blind study subjects to the intervention they received?                                                                                                                                            | 0 |
| 15. Was an attempt made to blind those measuring the main outcomes of the intervention?                                                                                                                                       | 0 |
| 16. If any of the results of the study were based on “data dredging”, was this made clear?                                                                                                                                    | 0 |
| 17. In trials and cohort studies, do the analyses adjust for different lengths of follow-up of patients, or in case-control studies, is the time period between the intervention and outcome the same for cases and controls? | 1 |
| 18. Were the statistical tests used to assess the main outcomes appropriate?                                                                                                                                                  | 1 |
| 19. Was compliance with the intervention/s reliable?                                                                                                                                                                          | 0 |
| 20. Were the main outcome measures used accurate (valid and reliable)?                                                                                                                                                        | 0 |
| <i>Confounding (selection bias)</i>                                                                                                                                                                                           |   |
| 21. Were the patients in different intervention groups (trials and cohort studies) or were the cases and controls (case-control studies) recruited from the same population?                                                  | 1 |
| 22. Were study subjects in different intervention groups (trials and cohort studies) or were the cases and controls (case-control studies) recruited over the same time?                                                      | 1 |
| 23. Were study subjects randomized to intervention groups?                                                                                                                                                                    | 1 |
| 24. Was the randomized intervention assignment concealed from both patients and health care staff until recruitment was complete and irrevocable?                                                                             | 0 |
| 25. Was there adequate adjustment for confounding in the analyses from which the main findings were drawn?                                                                                                                    | 0 |

|                                                                                                                                                                                                                               |              |
|-------------------------------------------------------------------------------------------------------------------------------------------------------------------------------------------------------------------------------|--------------|
| 26. Were losses of patients to follow-up taken into account?                                                                                                                                                                  | 0            |
| <i>Power</i>                                                                                                                                                                                                                  |              |
| 27. Did the study have sufficient power to detect a clinically important effect where the probability value for a difference being due to chance is < 5%                                                                      | 1            |
| <b><i>Muijen et al 1991</i></b>                                                                                                                                                                                               | <b>Score</b> |
| <i>Reporting</i>                                                                                                                                                                                                              |              |
| 1. Is the hypothesis/aim/objective of the study clearly described?                                                                                                                                                            | 1            |
| 2. Are the main outcomes to be measured clearly described in the introduction or methods section?                                                                                                                             | 1            |
| 3. Are the characteristics of the patients included in the study clearly described?                                                                                                                                           | 1            |
| 4. Are the intervention of interest clearly described?                                                                                                                                                                        | 1            |
| 5. Are the distributions of principal confounder in each group of subjects to be compared clearly described?                                                                                                                  | 1            |
| 6. Are the main findings of the study clearly described?                                                                                                                                                                      | 1            |
| 7. Does the study provide estimates of the random variability in the data for the main outcomes?                                                                                                                              | 1            |
| 8. Have all of the important adverse events that may be a consequence of the intervention been reported?                                                                                                                      | 0            |
| 9. Have the characteristics of patients lost to follow-up been described?                                                                                                                                                     | 1            |
| 10. Have actual probability values been reported for the main outcomes except where the probability value is less than 0.001?                                                                                                 | 0            |
| <i>External validity</i>                                                                                                                                                                                                      |              |
| 11. Were the subjects asked to participate in the study representative of the entire sample from which they were recruited?                                                                                                   | 1            |
| 12. Were those subjects who were prepared to participated representative of the entire population from which they were recruited?                                                                                             | 0            |
| 13. Were the staff, places, and facilities where the patients were treated, representative of the treatment the majority of patients receive?                                                                                 | 1            |
| <i>Study bias</i>                                                                                                                                                                                                             |              |
| 14. Was an attempt made to blind study subjects to the intervention they received?                                                                                                                                            | 0            |
| 15. Was an attempt made to blind those measuring the main outcomes of the intervention?                                                                                                                                       | 0            |
| 16. If any of the results of the study were based on “data dredging”, was this made clear?                                                                                                                                    | 0            |
| 17. In trials and cohort studies, do the analyses adjust for different lengths of follow-up of patients, or in case-control studies, is the time period between the intervention and outcome the same for cases and controls? | 1            |
| 18. Were the statistical tests used to assess the main outcomes appropriate?                                                                                                                                                  | 1            |
| 19. Was compliance with the intervention/s reliable?                                                                                                                                                                          | 0            |
| 20. Were the main outcome measures used accurate (valid and reliable)?                                                                                                                                                        | 0            |
| <i>Confounding (selection bias)</i>                                                                                                                                                                                           |              |

|                                                                                                                                                                              |   |
|------------------------------------------------------------------------------------------------------------------------------------------------------------------------------|---|
| 21. Were the patients in different intervention groups (trials and cohort studies) or were the cases and controls (case-control studies) recruited from the same population? | 1 |
| 22. Were study subjects in different intervention groups (trials and cohort studies) or were the cases and controls (case-control studies) recruited over the same time?     | 1 |
| 23. Were study subjects randomized to intervention groups?                                                                                                                   | 1 |
| 24. Was the randomized intervention assignment concealed from both patients and health care staff until recruitment was complete and irrevocable?                            | 0 |
| 25. Was there adequate adjustment for confounding in the analyses from which the main findings were drawn?                                                                   | 0 |
| 26. Were losses of patients to follow-up taken into account?                                                                                                                 | 0 |
| <i>Power</i>                                                                                                                                                                 |   |
| 27. Did the study have sufficient power to detect a clinically important effect where the probability value for a difference being due to chance is < 5%                     | 1 |
